# Supplementary material
Source: PubMed Central journal article supplement (PMC9901223)
Supplement: mmc1.pdf [file mmc1.pdf]

# Conflicts of Interest Statement

---

Manuscript title: Trends in assault-related hospitalizations during the SARS-CoV-2 pandemic

---

---

The authors whose names are listed immediately below certify that they have NO affiliations with or involvement in any organization or entity with any financial interest (such as honoraria; educational grants; participation in speakers' bureaus; membership, employment, consultancies, stock ownership, or other equity interest; and expert testimony or patent-licensing arrangements), or non-financial interest (such as personal or professional relationships, affiliations, knowledge or beliefs) in the subject matter or materials discussed in this manuscript.

**Author names:**

Brett Shannon (MBBS, MAE)  
Chibuzor Abasilim (MBR, MPH)  
Lee S Friedman (PhD)<sup>1</sup>

The authors whose names are listed immediately below report the following details of affiliation or involvement in an organization or entity with a financial or non-financial interest in the subject matter or materials discussed in this manuscript. Please specify the nature of the conflict on a separate sheet of paper if the space below is inadequate.

**Author names:**

The authors have no conflicts of interest in regard to this study.

Sources of financial support: No funding was solicited or received for this study.

IRB Approval: The University of Illinois at Chicago (UIC) IRB has approved this work (#2012-0116).

This statement is signed by all the authors to indicate agreement that the above information is true and correct (a photocopy of this form may be used if there are more than 10 authors):

Author's name (typed)

Author's signature

Date

Brett Shannon



10/11/2022

Chibuzor Abasilim

*Chibuzor Abasilim*

10/11/2022

Lee Friedman



10/11/2022

\_\_\_\_\_

\_\_\_\_\_

\_\_\_\_\_

\_\_\_\_\_

\_\_\_\_\_

\_\_\_\_\_

\_\_\_\_\_

\_\_\_\_\_

\_\_\_\_\_

\_\_\_\_\_

\_\_\_\_\_

\_\_\_\_\_

\_\_\_\_\_

\_\_\_\_\_

\_\_\_\_\_

\_\_\_\_\_

\_\_\_\_\_

\_\_\_\_\_

\_\_\_\_\_

\_\_\_\_\_

\_\_\_\_\_
